# Supplementary material for: Genetic Variability for Grain Components Related to Nutritional Quality in Spelt and Common Wheat
Source: PubMed Central journal article supplement (PMC10360148; doi:10.1021/acs.jafc.3c02365), 2023-07-03
Supplement: jf3c02365_si_001.pdf [file jf3c02365_si_001.pdf]

**Supplementary information for:**

**Genetic variability for grain components related to nutritional quality in spelt and common wheat**

Ana Belén Huertas-García<sup>1</sup>, Facundo Tabbita<sup>1,2</sup>, Juan B. Alvarez<sup>1,\*</sup>, Josefina C. Sillero<sup>3</sup>, M. Itria Ibba<sup>4</sup>, Marianna Rakszegi<sup>5</sup> and Carlos Guzmán<sup>1</sup>

<sup>1</sup> Departamento de Genética, Escuela Técnica Superior de Ingeniería Agronómica y de Montes, Edificio Gregor Mendel, Campus de Rabanales, Universidad de Córdoba, CeiA3, ES-14071 Córdoba, Spain;

<sup>2</sup> Instituto Nacional de Tecnología Agropecuaria (INTA), Instituto de Recursos Biológicos, N. Repetto y los Reseros s/n, Hurlingham (1686), Buenos Aires, Argentina

<sup>3</sup> IFAPA Alameda del Obispo, Avenida Menéndez Pidal s/n, 14004 Cordoba, Spain

<sup>4</sup> Global Wheat Program, International Maize and Wheat Improvement Center (CIMMYT), Apdo Postal 6-641, Mexico DF, Mexico

<sup>5</sup> Agricultural Institute, Centre for Agricultural Research, Brunszvik u. 2, 2462 Martonvásár, Hungary

\* Corresponding author: [jb.alvarez@uco.es](mailto:jb.alvarez@uco.es)

**Table S1.** Plant material used in the study

| <b>Species</b>                | <b>Common name</b> | <b>University of Cordoba<br/>Accession Number</b> | <b>Germplasm Bank<br/>Accession Number</b> |
|-------------------------------|--------------------|---------------------------------------------------|--------------------------------------------|
| Triticum aestivum ssp. spelta | Spelt              | Esp 1                                             | BGE 001947                                 |
| Triticum aestivum ssp. spelta | Spelt              | Esp 5                                             | BGE 002002                                 |
| Triticum aestivum ssp. spelta | Spelt              | Esp 6                                             | BGE 001978                                 |
| Triticum aestivum ssp. spelta | Spelt              | Esp 19                                            | BGE 001990                                 |
| Triticum aestivum ssp. spelta | Spelt              | Esp 25                                            | BGE 012911                                 |
| Triticum aestivum ssp. spelta | Spelt              | Esp 36                                            | BGE 014270                                 |
| Triticum aestivum ssp. spelta | Spelt              | Esp 48                                            | PI 348755                                  |
| Triticum aestivum ssp. spelta | Spelt              | Esp 51                                            | PI 348428                                  |
| Triticum aestivum ssp. spelta | Spelt              | Esp 57                                            | PI 348439                                  |
| Triticum aestivum ssp. spelta | Spelt              | Esp 65                                            | PI 348455                                  |
| Triticum aestivum ssp. spelta | Spelt              | Esp 68                                            | PI 348458                                  |
| Triticum aestivum ssp. spelta | Spelt              | Esp 72                                            | PI 348462                                  |
| Triticum aestivum ssp. spelta | Spelt              | Esp 73                                            | PI 348463                                  |
| Triticum aestivum ssp. spelta | Spelt              | Esp 74                                            | PI 348465                                  |
| Triticum aestivum ssp. spelta | Spelt              | Esp 78                                            | PI 348471                                  |
| Triticum aestivum ssp. spelta | Spelt              | Esp 80                                            | PI 348473                                  |
| Triticum aestivum ssp. spelta | Spelt              | Esp 84                                            | PI 348478                                  |
| Triticum aestivum ssp. spelta | Spelt              | Esp 86                                            | PI 348480                                  |
| Triticum aestivum ssp. spelta | Spelt              | Esp 88                                            | PI 348483                                  |
| Triticum aestivum ssp. spelta | Spelt              | Esp 92                                            | PI 348489                                  |
| Triticum aestivum ssp. spelta | Spelt              | Esp 94                                            | PI 348493                                  |
| Triticum aestivum ssp. spelta | Spelt              | Esp 95                                            | PI 348495                                  |
| Triticum aestivum ssp. spelta | Spelt              | Esp 105                                           | PI 348515                                  |
| Triticum aestivum ssp. spelta | Spelt              | Esp 107                                           | Pi 348519                                  |
| Triticum aestivum ssp. spelta | Spelt              | Esp 121                                           | PI 348544                                  |
| Triticum aestivum ssp. spelta | Spelt              | Esp 135                                           | PI 348570                                  |
| Triticum aestivum ssp. spelta | Spelt              | Esp 136                                           | PI 348572                                  |
| Triticum aestivum ssp. spelta | Spelt              | Esp 182                                           | PI 348676                                  |
| Triticum aestivum ssp. spelta | Spelt              | Esp 186                                           | PI 348693                                  |
| Triticum aestivum ssp. spelta | Spelt              | Esp 188                                           | PI 348696                                  |
| Triticum aestivum ssp. spelta | Spelt              | Esp 190                                           | PI 348698                                  |
| Triticum aestivum ssp. spelta | Spelt              | Esp 192                                           | PI 348701                                  |
| Triticum aestivum ssp. spelta | Spelt              | Esp 193                                           | PI 348702                                  |
| Triticum aestivum ssp. spelta | Spelt              | Esp 196                                           | PI 348712                                  |
| Triticum aestivum ssp. spelta | Spelt              | Esp 203                                           | PI 348727                                  |
| Triticum aestivum ssp. spelta | Spelt              | Esp 204                                           | PI 348728                                  |
| Triticum aestivum ssp. spelta | Spelt              | Esp 211                                           | PI 348741                                  |
| Triticum aestivum ssp. spelta | Spelt              | Esp 216                                           | PI 348747                                  |
| Triticum aestivum ssp. spelta | Spelt              | Esp 224                                           | PI 348767                                  |
| Triticum aestivum ssp. spelta | Spelt              | Esp 227                                           | PI 348771                                  |
| Triticum aestivum ssp. spelta | Spelt              | Esp 232                                           | PI 469022                                  |
| Triticum aestivum ssp. spelta | Spelt              | Esp 233                                           | PI 469023                                  |
| Triticum aestivum ssp. spelta | Spelt              | Esp 234                                           | PI 469024                                  |
| Triticum aestivum ssp. spelta | Spelt              | Esp 236                                           | PI 469026                                  |

| <b>Species</b>                | <b>Common name</b> | <b>University of Cordoba<br/>Accession Number</b> | <b>Germplasm Bank<br/>Accession Number</b> |
|-------------------------------|--------------------|---------------------------------------------------|--------------------------------------------|
| Triticum aestivum ssp. spelta | Spelt              | Esp 237                                           | PI 469028                                  |
| Triticum aestivum ssp. spelta | Spelt              | Esp 238                                           | PI 469029                                  |
| Triticum aestivum ssp. spelta | Spelt              | Esp 239                                           | PI 469030                                  |
| Triticum aestivum ssp. spelta | Spelt              | Esp 240                                           | PI 469031                                  |
| Triticum aestivum ssp. spelta | Spelt              | Esp 241                                           | PI 469032                                  |
| Triticum aestivum ssp. spelta | Spelt              | Esp 242                                           | PI 469042                                  |
| Triticum aestivum ssp. spelta | Spelt              | Esp 243                                           | PI 469045                                  |
| Triticum aestivum ssp. spelta | Spelt              | Esp 244                                           | PI 469046                                  |
| Triticum aestivum ssp. spelta | Spelt              | Esp 245                                           | PI 469047                                  |
| Triticum aestivum ssp. spelta | Spelt              | Esp 246                                           | PI 469048                                  |
| Triticum aestivum ssp. spelta | Spelt              | Esp 247                                           | PI 469049                                  |
| Triticum aestivum ssp. spelta | Spelt              | Esp 248                                           | PI 469050                                  |
| Triticum aestivum ssp. spelta | Spelt              | Esp 249                                           | PI 469051                                  |
| Triticum aestivum ssp. spelta | Spelt              | Esp 250                                           | PI 469053                                  |
| Triticum aestivum ssp. spelta | Spelt              | Esp 251                                           | PI 469054                                  |
| Triticum aestivum ssp. spelta | Spelt              | Esp 252                                           | PI 469056                                  |
| Triticum aestivum ssp. spelta | Spelt              | Esp 253                                           | PI 469057                                  |
| Triticum aestivum ssp. spelta | Spelt              | Esp 254                                           | PI 469058                                  |
| Triticum aestivum ssp. spelta | Spelt              | Esp 255                                           | PI 469059                                  |
| Triticum aestivum ssp. spelta | Spelt              | Esp 256                                           | PI 469060                                  |
| Triticum aestivum ssp. spelta | Spelt              | Esp 257                                           | PI 469038                                  |
| Triticum aestivum ssp. spelta | Spelt              | Esp 258                                           | PI 469039                                  |
| Triticum aestivum ssp. spelta | Spelt              | Esp 259                                           | PI 469040                                  |
| Triticum aestivum ssp. spelta | Spelt              | Esp 260                                           | PI 469034                                  |
| Triticum aestivum ssp. spelta | Spelt              | Esp 262                                           | BGE 014252                                 |
| Triticum aestivum ssp. spelta | Spelt              | Esp 263                                           | BGE 017153                                 |
| Triticum aestivum ssp. spelta | Spelt              | Esp 264                                           | BGE 020898                                 |
| Triticum aestivum ssp. spelta | Spelt              | Esp 265                                           | BEG 20903                                  |
| Triticum aestivum ssp. spelta | Spelt              | Esp 268                                           | BGE 023734                                 |
| Triticum aestivum ssp. spelta | Spelt              | Esp 272                                           | BGE 012920                                 |
| Triticum aestivum ssp. spelta | Spelt              | Esp 276                                           | BGE 012937                                 |
| Triticum aestivum ssp. spelta | Spelt              | Esp 279                                           | BGE 020935                                 |
| Triticum aestivum ssp. spelta | Spelt              | Esp 281                                           | BGE 025420                                 |
| Triticum aestivum ssp. spelta | Spelt              | Esp 285                                           | BGE 001972                                 |
| Triticum aestivum ssp. spelta | Spelt              | Esp 288                                           | BGE 002005                                 |
| Triticum aestivum ssp. spelta | Spelt              | Esp 292                                           | BGE 012932                                 |
| Triticum aestivum ssp. spelta | Spelt              | Esp 293                                           | BGE 012906                                 |
| Triticum aestivum ssp. spelta | Spelt              | Esp 295                                           | BGE 012935                                 |
| Triticum aestivum ssp. spelta | Spelt              | Esp 300                                           | BGE 002006                                 |
| Triticum aestivum ssp. spelta | Spelt              | Esp 380                                           | BGE 012903                                 |
| Triticum aestivum ssp. spelta | Spelt              | Esp 383                                           | BGE 012902                                 |
| Triticum aestivum ssp. spelta | Spelt              | Esp 384                                           | BEG 20900                                  |
| Triticum aestivum ssp. spelta | Spelt              | Esp 385                                           | BGE 012931                                 |
| Triticum aestivum ssp. spelta | Spelt              | Esp 387                                           | BGE 012766                                 |
| Triticum aestivum ssp. spelta | Spelt              | Esp 396                                           | PI 469041                                  |

| <b>Species</b>                  | <b>Common name</b> | <b>University of Cordoba<br/>Accession Number</b> | <b>Germplasm Bank<br/>Accession Number</b> |
|---------------------------------|--------------------|---------------------------------------------------|--------------------------------------------|
| Triticum aestivum ssp. spelta   | Spelt              | Anna Maria                                        | Anna Maria                                 |
| Triticum aestivum ssp. aestivum | Common wheat       | Antequera                                         | Antequera                                  |
| Triticum aestivum ssp. aestivum | Common wheat       | Arthur Nick                                       | Arthur Nick                                |
| Triticum aestivum ssp. aestivum | Common wheat       | Conil                                             | Conil                                      |
| Triticum aestivum ssp. aestivum | Common wheat       | Galera                                            | Galera                                     |
| Triticum aestivum ssp. aestivum | Common wheat       | Montemayor                                        | Montemayor                                 |
| Triticum aestivum ssp. aestivum | Common wheat       | Rota                                              | Rota                                       |
| Triticum aestivum ssp. aestivum | Common wheat       | Santaella                                         | Santaella                                  |
| Triticum aestivum ssp. aestivum | Common wheat       | Setenil                                           | Setenil                                    |
| Triticum aestivum ssp. aestivum | Common wheat       | Tejada                                            | Tejada                                     |

**Table S4.** Correlation coefficients among the evaluated traits in spelt.

|        | TW         | TKW        | GPC        | Fe         | Zn         | PA        | PA-Fe     | PA-Zn      | TOT-AX    |
|--------|------------|------------|------------|------------|------------|-----------|-----------|------------|-----------|
| TKW    | -0.2995*** |            |            |            |            |           |           |            |           |
| GPC    | -0.3532*** | 0.1477**   |            |            |            |           |           |            |           |
| Fe     | -0.1372**  | 0.3246***  | 0.3402***  |            |            |           |           |            |           |
| Zn     | -0.1955*** | 0.1658**   | 0.6389***  | 0.3847***  |            |           |           |            |           |
| PA     | -0.2119*** | 0.0083 ns  | 0.2781***  | 0.0784 ns  | 0.4092***  |           |           |            |           |
| PA-Fe  | -0.0153 ns | -0.2562*** | -0.0960 ns | -0.7298*** | -0.0466 ns | 0.6101*** |           |            |           |
| PA-Zn  | 0.0408 ns  | -0.1606**  | -0.4243*** | -0.3296*** | -0.6894*** | 0.3636*** | 0.5266*** |            |           |
| TOT-AX | -0.1858*** | 0.1446**   | 0.1339*    | -0.0005 ns | 0.1180*    | 0.1413**  | 0.0900 ns | -0.0132 ns |           |
| WE-AX  | -0.3255*** | 0.2577***  | 0.1121*    | 0.0602 ns  | 0.1625**   | 0.2674*** | 0.1211*   | 0.0301 ns  | 0.3743*** |

\*\*\*, \*\*, \*: significant at 99.9, 99 and 95%; ns: not significant.
